# Supplementary material for: Effect of Hypercholesterolemia, Systemic Arterial Hypertension and Diabetes Mellitus on Peripapillary and Macular Vessel Density on Superficial Vascular Plexus in Glaucoma
Source: MDPI journal article supplement (doi:10.3390/jcm12052071), 2023-03-06
Supplement: s1 [file s1]

Table S1. Demographic, clinical, and ocular characteristics of 115 OAG patients and 115 age-matched healthy subjects.

|                                     | Normal + glaucoma subjects (n=230) | Normal (n=115)    | Glaucoma (n=115) | P value  |
|-------------------------------------|------------------------------------|-------------------|------------------|----------|
| Gender (M/F)                        | 92/138                             | 40/75             | 52/63            | 0.139&   |
| Age (yr)                            | 62.59±13.48                        | 61.40±14.10       | 63.40±12.78      | 0.182#   |
| Patients under glaucoma medications | 85 (37%)                           | -                 | 85 (37%)         | -        |
| Number of glaucoma medications      | 1 [0;2]                            | -                 | 1 [0;2]          | -        |
| Glaucoma surgery                    | 11 (9.56%)                         | -                 | 11 (9.56%)       | -        |
| Mean Defect (dB)                    | 1 [-2;3]                           | -2 [-2;6]         | 1 [-1.25;-0.5]   | 0.542*   |
| Arterial hypertension               | 98/132                             | 34 (29.6%)        | 64 (55.6%)       | <0.0001& |
| Diabetes mellitus                   | 42/188                             | 28 (24.3%)        | 14 (12.2%)       | 0.026&   |
| Hypercholesterolaemia               | 68/162                             | 20 (17.4%)        | 48 (41.7%)       | <0.0001& |
| Pseudophakia                        | 63/167                             | 34 (29.6%)        | 29 (25.2%)       | 0.554&   |
| Visual Acuity                       | 0.76±0.24                          | 0.74±0.26         | 0.78±0.22        | 0.230#   |
| Sphere                              | 0.59±1.90                          | 0.48±1.82         | 0.70±1.98        | 0.021#   |
| Astigmatism                         | -0.75 [-1.31;-0.5]                 | -0.75 [-1.5;-0.5] | -1 [-1.25;-0.5]  | 0.716*   |
| IOP GAT (mmHg)                      | 16.96±3.87                         | 15.80±2.79        | 18.11±4.42       | <0.0001# |
| IOP iCare (mmHg)                    | 17.04±4.26                         | 16.03±3.16        | 18.06±4.94       | <0.0001# |
| CCT (μ)                             | 531.38±55.04                       | 529.27±62.67      | 533.49±46.34     | 0.562#   |
| SD-OCT parameters                   |                                    |                   |                  |          |
| Disc area (mm <sup>2</sup> )        | 1.86±0.37                          | 1.87±0.37         | 1.85±0.38        | 0.820#   |
| Rim area (mm <sup>2</sup> )         | 1.21±0.31                          | 1.32±0.25         | 1.09±0.32        | <0.0001# |
| C/D                                 | 0.55±0.18                          | 0.47±0.20         | 0.60±0.18        | <0.0001# |
| Vertical C/D                        | 0.53±0.18                          | 0.49±0.17         | 0.58±0.19        | <0.0001# |
| Cup Volume                          | 0.22±0.20                          | 0.15±0.15         | 0.28±0.23        | <0.0001# |
| RNFL (μ)                            | 89.41±13.11                        | 94.76±9.60        | 85.06±14.66      | <0.0001# |
| GCIPL (μ)                           | 262.52±29.70                       | 262.50±25.96      | 262.55±33.14     | 0.989#   |

&Chi-square test

# t-Student test

\* Median test

All above measurements are represented by mean±SD except Mean Defect which are expressed by Median and [P25;P75]

GAT Goldmann aplanation tonometry

IOP Intraocular pressure

MD Mean defect; C/D (cup to disc ratio)

GCIPL= Average Ganglion cell layer and inner plexiform layer

RNFL= Average Retinal Nerve Fiber Layer

Table S2. Comparison of peripapillary and macular vessel density evaluated by OCTA between glaucoma and normal groups of 115 OAG patients and 115 age-matched healthy subjects.

|                                                              | Normal (n=115) | Glaucoma (n=115) | P value |
|--------------------------------------------------------------|----------------|------------------|---------|
| <b>Peripapillary OCTA Vessel Density</b>                     |                |                  |         |
| Whole Peripapillary Perfusion Density (%)                    | 44.59±1.73     | 43.48±2.29       | <0.0001 |
| Whole Peripapillary Blood Flux Index                         | 0.44±0.04      | 0.41±0.04        | <0.0001 |
| Peripapillary Perfusion Density in the superior quadrant (%) | 42.89±2.44     | 41.45±3.18       | <0.0001 |
| Peripapillary Blood Flux Index in the superior quadrant      | 0.42±0.03      | 0.40±0.04        | <0.0001 |
| Peripapillary Perfusion Density in the inferior quadrant (%) | 44.88±2.39     | 42.13±3.68       | <0.0001 |
| Peripapillary Blood Flux Index in the inferior quadrant      | 0.43±0.03      | 0.41±0.04        | <0.0001 |
| Peripapillary Perfusion Density in the temporal quadrant (%) | 47.04±2.88     | 46.87±2.62       | 0.643   |
| Peripapillary Blood Flux Index in the temporal quadrant      | 0.44±0.43      | 0.42±0.05        | <0.0001 |
| Peripapillary Perfusion Density in the nasal quadrant (%)    | 43.53±2.41     | 42.96±2.51       | 0.080   |
| Peripapillary Blood Flux Index in the nasal quadrant         | 0.44±0.04      | 0.41±0.05        | <0.0001 |
| <b>Macular OCTA Vessel Density</b>                           |                |                  |         |
| Whole Macular Perfusion Density (%)                          | 42.67±4.88     | 41.47±5.13       | 0.070   |
| Macular Perfusion Density in the outer circle (%)            | 44.03±5.11     | 42.60±5.15       | 0.036   |
| Macular Perfusion Density in the inner circle (%)            | 41.21±5.19     | 40.39±6.01       | 0.268   |
| Macular Perfusion Density in the central circle (%)          | 20.08±7.48     | 19.99±7.81       | 0.929   |
| Foveal Avascular Zone Area (mm <sup>2</sup> )                | 0.23±0.11      | 0.22±0.13        | 0.571   |
| Foveal Avascular Perimeter (mm)                              | 1.97±0.78      | 1.96±0.57        | 0.949   |
| Acircularity Index                                           | 0.70±0.09      | 0.69±0.11        | 0.499   |

t-Student test

All above measurements are represented by mean ±SD

Table S3. Correlation between peripapillary and macular vessel density indices analyzed with OCTA and demographic and clinical data and SD-OCT parameters of 115 OAG patients and 115 age-matched healthy subjects.

|                                       | Whole<br>Peripapillary<br>Perfusion Density<br>(%) | Peripapillary<br>Perfusion Density in<br>the superior<br>quadrant (%) | Peripapillary<br>Perfusion Density in<br>the inferior<br>quadrant (%) | Peripapillary<br>Perfusion Density in<br>the temporal<br>quadrant (%) | Peripapillary<br>Perfusion Density in<br>the nasal<br>quadrant (%) | Whole Macular<br>Perfusion<br>Density<br>(%) | Macular<br>Perfusion Density<br>in the outer circle<br>(%) | Macular<br>Perfusion<br>Density in the<br>inner circle<br>(%) | Macular<br>Perfusion<br>Density in the<br>central circle<br>(%) |
|---------------------------------------|----------------------------------------------------|-----------------------------------------------------------------------|-----------------------------------------------------------------------|-----------------------------------------------------------------------|--------------------------------------------------------------------|----------------------------------------------|------------------------------------------------------------|---------------------------------------------------------------|-----------------------------------------------------------------|
| <b>Age (yr)</b>                       | -0.232<br>( $<0.0001$ )§                           | -0.193<br>(0.003)§                                                    | -0.299<br>( $<0.0001$ )§                                              |                                                                       |                                                                    | -0.401<br>( $<0.0001$ )§                     | -0.410<br>( $<0.0001$ )§                                   | -0.300<br>( $<0.0001$ )§                                      | -0.192<br>(0.003)§                                              |
| <b>Glaucoma<br/>medications</b>       | -0.327<br>( $<0.0001$ )*                           | -0.293<br>( $<0.0001$ )*                                              | -0.440<br>( $<0.0001$ )*                                              |                                                                       |                                                                    | -0.155<br>(0.019)*                           | -0.214<br>( $<0.0001$ )*                                   |                                                               |                                                                 |
| <b>Mean Defect<br/>(dB)</b>           | -0.597<br>(0.024)*                                 | -0.536<br>(0.048)*                                                    |                                                                       |                                                                       |                                                                    | -0.772<br>(0.001)*                           | -0.853<br>( $<0.0001$ )*                                   |                                                               |                                                                 |
| <b>Visual Acuity</b>                  |                                                    |                                                                       |                                                                       |                                                                       | -0.208<br>(0.002)§                                                 | 0.238<br>( $<0.0001$ )§                      | 0.242<br>( $<0.0001$ )§                                    | 0.176<br>(0.007)§                                             | 0.193<br>(0.003)§                                               |
| <b>Sphere</b>                         | 0.135<br>(0.040)§                                  |                                                                       |                                                                       | 0.144<br>(0.029)§                                                     | 0.176<br>(0.008)§                                                  |                                              |                                                            | -0.145<br>(0.010)§                                            | -0.241<br>( $<0.0001$ )§                                        |
| <b>Astigmatism</b>                    |                                                    |                                                                       |                                                                       |                                                                       | -0.147<br>(0.026)*                                                 | 0.229<br>( $<0.0001$ )*                      | 0.216<br>(0.001)*                                          | 0.211<br>(0.001)*                                             | 0.143<br>(0.031)*                                               |
| <b>IOP GAT<br/>(mmHg)</b>             |                                                    |                                                                       |                                                                       |                                                                       |                                                                    |                                              |                                                            |                                                               |                                                                 |
| <b>IOP iCare<br/>(mmHg)</b>           |                                                    |                                                                       |                                                                       |                                                                       | -0.131<br>(0.047)*                                                 |                                              |                                                            |                                                               |                                                                 |
| <b>CCT (μ)</b>                        | 0.151<br>(0.022)§                                  | 0.191<br>(0.004)§                                                     |                                                                       |                                                                       |                                                                    |                                              |                                                            |                                                               |                                                                 |
| <b>SD-OCT<br/>parameters</b>          |                                                    |                                                                       |                                                                       |                                                                       |                                                                    |                                              |                                                            |                                                               |                                                                 |
| <b>Disc area<br/>(mm<sup>2</sup>)</b> |                                                    |                                                                       |                                                                       |                                                                       | 0.136<br>(0.040)*                                                  |                                              |                                                            |                                                               |                                                                 |
| <b>Rimarea<br/>(mm<sup>2</sup>)</b>   | 0.404<br>( $<0.0001$ )§                            | 0.253<br>( $<0.0001$ )§                                               | 0.472<br>( $<0.0001$ )§                                               | 0.190<br>(0.004)§                                                     | 0.263<br>( $<0.0001$ )§                                            | 0.130<br>(0.049)§                            | 0.182<br>(0.006)§                                          |                                                               | -0.194<br>(0.003)§                                              |
| <b>C/D</b>                            | -0.212<br>(0.001)§                                 |                                                                       | -0.292<br>( $<0.0001$ )§                                              |                                                                       | -0.143<br>(0.030)§                                                 |                                              |                                                            |                                                               |                                                                 |
| <b>Vertical C/D</b>                   | -0.255<br>( $<0.0001$ )§                           |                                                                       | -0.343<br>( $<0.0001$ )§                                              |                                                                       | -0.137<br>(0.037)§                                                 |                                              | -0.140<br>(0.034)§                                         |                                                               |                                                                 |
| <b>Cup Volume</b>                     | -0.212<br>(0.001)§                                 | -0.134<br>(0.042)§                                                    | -0.332<br>( $<0.0001$ )§                                              |                                                                       | -0.129<br>(0.022)§                                                 |                                              | -0.133<br>(0.018)§                                         |                                                               |                                                                 |
| <b>RNFL (μ)</b>                       | 0.572                                              | 0.385                                                                 | 0.642                                                                 | 0.354                                                                 | 0.324                                                              | 0.172                                        | 0.379                                                      | 0.146                                                         |                                                                 |

|                  |            |            |            |            |            |          |            |          |                     |
|------------------|------------|------------|------------|------------|------------|----------|------------|----------|---------------------|
|                  | (<0.0001)§ | (<0.0001)§ | (<0.0001)§ | (<0.0001)§ | (<0.0001)§ | (0.002)§ | (<0.0001)§ | (0.027)§ | 0.289<br>(<0.0001)§ |
| <b>GCIPL (μ)</b> |            |            |            |            |            |          |            |          |                     |

§ Pearson Correlation Coefficient.

\* Spearman Correlation Coefficient.

GAT Goldmann aplanation tonometry

IOP Intraocular pressure

MD Mean defect; C/D (cup to disc ratio)

GCIPL= Average Ganglion cell layer and inner plexiform layer

RNFL= Average Retinal Nerve Fiber Layer

Table S4. Linear regression analysis to evaluate the effect of glaucoma, SAH, HC and DM diagnosis and the most relevant demographic and clinical data on sPVD and sMVD of 115 OAG patients and 115 age-matched healthy subjects.

|                                                                     | <b>β</b> | <b>95% CI</b>   | <b>p</b> |
|---------------------------------------------------------------------|----------|-----------------|----------|
| <b>Whole Peripapillary Perfusion Density (%)</b>                    |          |                 |          |
| Diabetes mellitus                                                   | 1.153    | (0.523;1.783)   | <0.0001  |
| Gender                                                              | 1.023    | (0.544;1.501)   | <0.0001  |
| Pseudophakia                                                        | 1.435    | (0.898;1.972)   | <0.0001  |
| Glaucoma                                                            | 0.919    | (0.447;1.390)   | <0.0001  |
| <b>Peripapillary Perfusion Density in the superior quadrant (%)</b> |          |                 |          |
| Pseudophakia                                                        | 1.701    | (0.914;2.488)   | <0.0001  |
| Gender                                                              | 0.922    | (0.222;1.623)   | 0.010    |
| Diabetes mellitus                                                   | 1.483    | (0.560;2.406)   | 0.002    |
| Glaucoma                                                            | 1.235    | (0.545;1.926)   | 0.001    |
| <b>Peripapillary Perfusion Density in the inferior quadrant (%)</b> |          |                 |          |
| Gender                                                              | 1.730    | (0.987;2.472)   | <0.0001  |
| Pseudophakia                                                        | 1.814    | (0.891;2.737)   | <0.0001  |
| Glaucoma                                                            | 2.548    | (1.815;3.282)   | <0.0001  |
| Age                                                                 | -0.041   | (-0.072;-0.011) | 0.009    |
| <b>Peripapillary Perfusion Density in the temporal quadrant (%)</b> |          |                 |          |
| Pseudophakia                                                        | 0.834    | (0.040;1.629)   | 0.040    |
| <b>Peripapillary Perfusion Density in the nasal quadrant (%)</b>    |          |                 |          |

|                                                            |        |                 |         |
|------------------------------------------------------------|--------|-----------------|---------|
| Diabetes mellitus                                          | 1.491  | (0.678;2.304)   | <0.0001 |
| Gender                                                     | 0.888  | (0.271;1.505)   | 0.005   |
| Pseudophakia                                               | 1.253  | (0.483;2.023)   | 0.002   |
| <b>Whole Macular PerfusionDensity (%)</b>                  |        |                 |         |
| Age                                                        | -0.130 | (-0.179;-0.081) | <0.0001 |
| <b>Macular Perfusion Density in the outer circle (%)</b>   |        |                 |         |
| Age                                                        | -0.132 | (-0.182;-0.082) | <0.0001 |
| Arterial Hypertension                                      | 1.702  | (0.343;3.061)   | 0.014   |
| <b>Macular Perfusion Density in the inner circle (%)</b>   |        |                 |         |
| Age                                                        | -0.125 | (-0.177;-0.073) | <0.0001 |
| <b>Macular Perfusion Density in the central circle (%)</b> |        |                 |         |
| Age                                                        | -0.109 | (-0.181;-0.036) | 0.003   |
| <b>Foveal Avascular Zone Area (mm2)</b>                    |        |                 |         |
| Gender                                                     | 0.047  | (0.015;0.070)   | 0.004   |
| Arterial hypertension                                      | 0.042  | (0.011;0.074)   | 0.009   |
| <b>Foveal Avascular Perimeter (mm)</b>                     |        |                 |         |
| Arterial hypertension                                      | 0.173  | (-0.005;0.351)  | 0.056   |
| <b>Acircularity Index</b>                                  |        |                 |         |
| Age                                                        | -0.002 | (-0.003;-0.001) | <0.0001 |

Variables entered in regression model: Glaucoma, age, gender, pseudophakia, arterial hypertension, diabetes mellitus, hypercholesterolaemia.

The variable included in  $\beta$  slope is the variable included in the backward step model.

$\beta$ = Beta slope; 95% CI=95% Confidence interval.
